# Supplementary material
Source: PubMed Central journal article supplement (PMC3752211)
Supplement: 1303967110_pnas.201303967SI.pdf [file 1303967110_pnas.201303967SI.pdf]

# Supporting Information

Vi et al. 10.1073/pnas.1303967110

## SI Results and Discussion

The following comments relate to the poly(A)-tail length assay. Because of the high sequence similarity between different members of the *SMALL AUXIN UP RNA (SAUR)* gene family, it was not possible to design primers that gave both efficient PCR amplification when used with the universal reverse primer from the Affymetrix poly(A) tail-length assay kit and that were able to discriminate between closely related *SAUR* genes. As a result, the PCR products shown in Fig. 3C and Figs. S3D and S4 B and D represent mixtures of products derived from two or four individual *SAUR* transcripts.

When comparing the normalized-intensity profiles in Fig. 3C and Fig. S3D, it appears that even after RNaseH digestion there is still a difference between the products from the *paps1-1* mutants and the other two genotypes. This might indicate a difference in the choice of cleavage site, with a bias toward more distal sites in wild type and *paps2 paps4* mutants. However, the sequencing results shown in Fig. S3B and Fig. S3G rule out this explanation; if anything, distal sites seem to be used more frequently in *paps1-1* mutants. In addition, subcloning and sequencing individual molecules from the *SAUR19/24* PCR products on RNaseH-treated wild-type RNA indeed detected short remaining poly(A) tails (Fig. S3C). Thus, the difference seen in the RNaseH-digested samples results from incomplete digestion of the poly(A) tails by RNaseH.

## SI Materials and Methods

**Plant Materials.** Transfer DNA (T-DNA) insertion mutants are in Col-0 background including *paps1-3* (T-DNA line WiscDsLox413-416L14), *paps2-1* (T-DNA line SALK\_126395), and *paps4-1* (T-DNA line SALK\_007979), and therefore Col-0 was used as wild-type control for these plants. SALK and WiscDsLox collections of T-DNA insertion mutants have been described previously (1, 2). T-DNA insertion mutants were obtained from the Nottingham *Arabidopsis* Stock Centre. For comparison with mutants in Col-0 background, the *paps1-1* allele was introgressed into the Col-0 background by three rounds of back-crossing. The *csf64-1* mutant, the *eds1-2* mutant, the *pad4-1* mutant, and the *dst2* mutant have been described previously (3-6), as has the *35S::GFP-SAUR19* transgene (7).

**Genetic Mapping and Mutant Identification.** The *paps1-1* mutant in *Ler* background was crossed to wild-type Col-0, and a segregating F2 population was established. This was used for genetic mapping as previously described (8).

**Genotyping Mutant Alleles.** The following primers were used:

| Oligonucleotide name | Sequence                       | Description                          |
|----------------------|--------------------------------|--------------------------------------|
| oSV166               | TAATGCCCATCATTAC<br>TCCTGCGAAT | genotype <i>paps1-1</i>              |
| oSV126               | GCTTTGTTTGATTCCA<br>TAGC       | genotype <i>paps1-1</i>              |
| oSV126               | GCTTTGTTTGATTCCA<br>TAGC       | genotype <i>paps1-3</i><br>LP primer |
| oSV78                | TGGGACCTAGACATGC<br>AACTAG     | genotype <i>paps1-3</i><br>RP primer |
| oSV120               | ACATGGAGATGTTGAA<br>CTGCC      | genotype <i>paps2-1</i><br>LP primer |

Cont.

| Oligonucleotide name | Sequence                        | Description                          |
|----------------------|---------------------------------|--------------------------------------|
| oSV121               | CCACTGTTCCACGTAT<br>ATCAAAC     | genotype <i>paps2-1</i><br>RP primer |
| oSV110               | TGCATCTGCTGCCACT<br>ATATC       | genotype <i>paps4-1</i><br>LP primer |
| oSV111               | TTGCTGAAGCTGTAGG<br>GTCTG       | genotype <i>paps4-1</i><br>RP primer |
| ML437                | TGGTTCACGTAGTGGG<br>CCATCG      | BP primer for<br>SALK-TDNA           |
| oSV139               | AACGTCGCAATGTGT<br>TATTAAGTTGTC | BP primer for<br>Ws-TDNA             |

Primers used for determining gene expression in T-DNA insertion mutants were:

| Oligonucleotide name | Sequence                                    | Description  |
|----------------------|---------------------------------------------|--------------|
| oSV198               | CCTAGTATGTTGGT<br>TTCTCGA                   | RT-PCR PAPS2 |
| oSV121               | CCACTGTTCCACGT<br>ATATCAAAC                 | RT-PCR PAPS2 |
| oSV110               | TGCATCTGCTGCCA<br>CTATATC                   | RT-PCR PAPS4 |
| oSV112               | CAATCGTGCCATGG<br>TGGTGGGTAC<br>TCAAATTTAGG | RT-PCR PAPS4 |

**Phenotypic Analysis, Measurements of Organ and Cell Sizes.** Petals were dissected from the 6th to 15th flowers and used for measurements. For leaves, the fourth and fifth leaves of plants at the bolting stage or the entire rosette were taken for measurements in all experiments except the one involving the *35S::GFP-SAUR19* transgene. For the latter the first two true leaves were collected.

For measuring petal-cell size, a drop of 2% (wt/vol) low-melt agarose containing 0.01% bromophenol blue prewarmed at 50 °C was placed on a prewarmed glass slide. The droplet was spread by a pipette tip to get a thin layer of agarose. A petal was immediately gently placed on it. Once the gel solidified, the petal was carefully peeled off, and the remaining gel cast was left to dry for approximately 10 min. The gel cast was then observed without a cover glass under a differential phase contrast microscope.

For determining cell size in leaves, leaves were fixed in FAA solution [10% (wt/vol) formaldehyde, 5% (vol/vol) acetic acid, and 50% (vol/vol) ethanol]. The FAA solution was then replaced with chloral hydrate solution (200 g chloral hydrate, 20 g glycerol, and 50 mL distilled water), and the tube was incubated overnight. Samples were mounted on a glass slide and observed under a differential phase contrast microscope.

**Alexander Staining of Pollen.** Mature pollen was mounted in Alexander's stain (9) and observed under a light microscope with 20× magnification after incubating for 15 min.

**In Vitro Polyadenylation Assay.** Reaction mixtures contained 2.5% (wt/vol) polyvinyl alcohol, 1 mM MnCl<sub>2</sub>, 100 ng BSA, 1 mM ATP, 0.5 U RNasin, 10 mM Hepes (pH 7.9), 25 mM NH<sub>4</sub>(SO<sub>4</sub>)<sub>2</sub>, 0.2 mM PMSF, and 0.2 mM DTT, and the indicated amounts of protein (wild type or mutant). Reaction mixtures were incubated for 30 min at room temperature, followed by proteinase K treatment, phenol/chloroform extraction, ethanol precipitation, and separation on 6% (wt/vol) urea-acrylamide gels.

The constructs pSV11b (pET28a-PAPS1cDNA-wt) and pSV11d (pET28a\_cDNAPAPS1-P313S-mutated; see below) were used for expressing the proteins. These were purified using Ni-NTA agarose.

**Measurement of Bulk Poly(A) Tail Length.** The protocol was adapted from ref. 10. RNA samples [2 µg, either untreated or digested with RNaseH/oligo(dT); see below] were 3'-end-labeled with 10 µCi <sup>32</sup>P-cordycepin using 5 U of yeast poly(A) polymerase. The reaction (10 µL) was incubated at 37 °C for 20 min, followed by heat inactivation at 70 °C for 10 min. The sample was then subjected to RNase treatment in a volume of 80 µL consisting of 10 mM Tris-HCl (pH 8), 300 mM NaCl, 5 µg RNaseA, and 125 U RNase T1 for 60 min at 37 °C. The RNase treatment was stopped in a volume of 100 µL consisting of 100 µg Proteinase K, 0.5% SDS, and 10 mM EDTA and incubated for 30 min at 37 °C. The reaction volume was then adjusted to 200 µL with the addition of 52 µg tRNA, 125 µg glycogen, ammonium acetate (to a final concentration of 2.5 M), and magnesium chloride (to a final concentration of 15 mM) and water. The RNA [poly(A) tails] were precipitated by adding 2.5 volumes of ice-cold ethanol and centrifuging for 1 h at 13,000 × *g* at 8 °C. The pellet was washed with ice-cold 80% (vol/vol) ethanol and allowed to dry at room temperature. The dried pellet was resuspended in 10 µL of loading buffer [94% (vol/vol) formamide, 20 mM EDTA, 0.2% bromophenol blue, and 0.2% xylene cyanol]. The poly(A) tails were then separated by electrophoresis on a 8.3 M urea/10% (wt/vol) polyacrylamide gel and visualized using autoradiography on a Typhoon phosphorimager.

**Microarray Analysis.** All plants were grown at 21 °C. For inflorescence collection, main inflorescences excluding the open flowers/buds were collected from 30-d-old plants grown on soil. Plants at the stage of harvest had approximately 7–12 siliques (wild type) or 2–5 siliques (mutant). Plants were grown in long day conditions, and material was collected at 5–7 h after the light period starts.

Whole seedlings including roots were harvested from 11-d-old (mutant) or 9-d-old (wild type) plants grown on MS plates. The different ages were used to ensure that the first true leaves were at a comparable developmental stage. Plants were grown in long day conditions, and material was collected at 5–7 h after the light period starts.

Total RNA was prepared by the hot phenol method (11) and cleaned up with the Qiagen RNAeasy Kit, digested with TURBO Dnase (Ambion). Subsequent labeling and array hybridization were carried out by CRX Biosciences Ltd.

A two-color array platform was used: Agilent *Arabidopsis* 4 × 44K oligo microarray and Agilent 4 × 44K gasket slides. One microgram of total RNA samples was used for labeling with the Quick Amp Labeling Kit—Two Color using the manufacturer's protocols.

Differentially expressed genes were identified using the R/Bioconductor package Limma (12). Background correction was done by subtracting background intensities and then setting zero or negative intensities to half the minimum of the positive ones. Two-color microarrays were normalized using the loess method (13).

**Quantitative RT-PCR and Measurements of Poly(A) Tail Length.** Primers used for quantitative RT-PCR are listed below.

| Gene name | AGI code  |     | Primer sequences                |
|-----------|-----------|-----|---------------------------------|
| SAUR19    | AT5G18010 | fw  | ATTTGGTGCCGCTC<br>TCATAC        |
|           |           | rev | TTCATTGGAGCCGA<br>GAAGTC        |
| SAUR20    | AT5G18020 | fw  | CCAAAAGGGTTTCT<br>TGCAGT        |
|           |           | rev | CATCGTTGGAACCG<br>AGAAGT        |
| SAUR60    | AT4G38860 | fw  | GTGCAAGCCACCAC<br>TTATCA        |
|           |           | rev | CGGACTAAAACCTG<br>TAAGATCCA     |
| SAUR63    | AT1G29440 | fw  | AGATTTCCGGTCTCC<br>CAACG        |
|           |           | rev | TGGTTGAAAAGAGC<br>ATCTAGCA      |
| PDF2      | At1g13320 | fw  | GCATTTCACTCCTC<br>TGGCTAAG      |
|           |           | rev | GGCACTTGGGTATG<br>CAATATG       |
| PR1       | AT2G14610 | fw  | TGTGCCAAAGTGAG<br>GTGTAAC       |
|           |           | rev | TGATGCTCCTTATT<br>GAAATACTGATAC |
| PR2       | AT3G57260 | fw  | GGTGTCCGAGACCG<br>GTTGGC        |
|           |           | rev | CCCTGGCCTTCTCG<br>GTGATCCA      |
| SID2      | AT1G74710 | fw  | TGAAGCAACACAT<br>CTCTACAGGCG    |
|           |           | rev | CCCGAAAAGGCTCG<br>GCCCAT        |

For poly(A) tail measurement, RNA was isolated as described before. To eliminate the activity of the temperature-sensitive protein encoded by the *paps1-1* allele as far as possible, plants were shifted to 30 °C for 2 h before harvesting. Poly(A) tail length was determined using the Affymetrix Poly(A) Tail-Length Assay Kit according to the manufacturer's instructions, using primers detailed below. PCR products from the poly(A) tail-length assays were analyzed on an Agilent 2100 Bio-analyzer. PCR products of *SAUR19/24* and *SAUR62/63/66/68* were subcloned and Sanger-sequenced. Obtained sequencing results were compared with the *Arabidopsis* genome.

Oligod(T)<sub>17</sub>/RNaseH digestion was performed as follows: 20 µg of DNase-digested RNA was mixed with 3.2 µL oligod(T)<sub>17</sub>, 10 µL 10× RNaseH buffer, 0.4 µL RNaseH (NEB), and 79.4 µL water and incubated for 1 h at 37 °C. Before G/I Tailing, RNA was precipitated adding 0.1 vol 3 M NaAc, 1 vol Isopropanol, incubated at –20 °C for a minimum of 30 min, centrifuged, washed with 70% (vol/vol) ethanol, dried, and dissolved in 10–15 µL water.

The following primers were used for poly(A) tail (PAT) tests. As discussed above, these primers amplify two to four very closely related transcripts when used in PAT assays.

|                    |                            |
|--------------------|----------------------------|
| At1g29440 (SAUR63) | AACGGAAGGACCAATCACATT      |
| At5g18010 (SAUR19) | GGCTCCAATGAAGATGATCCAACATT |

**Nuclei Isolation.** Nuclei were isolated from *Ler* wild-type and *paps1-1* mutant inflorescences that had been treated at 30 °C for 2 h, following the procedure from ref. 14. Enrichment of nuclei was determined by RT-PCR against *PDF2*, using the above primers that span two introns. As seen in Fig. S4A, there is a strong enrichment of unspliced or partially spliced transcripts in the nuclear RNA compared with total RNA. When quantified using the Bioanalyzer, the ratio of unspliced/partially spliced to completely spliced transcripts is more than 14-fold higher in the nuclear RNA sample than in total RNA.

**Molecular Cloning. Complementation of *paps1-1* mutants.** A genomic fragment of *PAPS1* (5,877 bp) was isolated from a TAC clone and ligated into the binary vector for plant transformation. TAC JAtY72B09 (15) containing the *PAPS1* locus was digested with *Xba*I, and the fragment around 5.8 kb was gel-purified and ligated into ML939 (a modified form of pBluescript) using the *Xba*I site to create plasmid pSV1. All plasmids were verified by partial sequencing and restriction enzyme digestion. The *PAPS1* locus was released from pSV1 by digesting with *Asc*I and ligated into binary vector ML1297 [a derivative of pGPTV-BAR (16)] using the *Asc*I site. The resulting plasmid (pSV2) was transformed into *Agrobacterium* strain GV3101, which was used to transform *paps1-1* mutants.

**Promoter swap pPAPS1::genomicPAPS4 experiment.** The genomic *PAPS4* fragment was isolated from TAC clone JAt49G10 by *Nco*I digestion and gel-purification of the 9,906-bp fragment. The fragment was ligated into ML939 using the *Nco*I site to create pSV5a (ML939-*Nco*I-*gPAPS4*-*Nco*I). An *Nco*I site was introduced at the ATG start codon of *gPAPS4* by overlap PCR using primer oSV106, oSV107, oSV112, and oSV113. The PCR product was ligated into pSV5a using *Pme*I and *Xho*I sites to create pSV5b (ML939-SDM-*Nco*I at ATG-*gPAPS4*-*Nco*I). An *Nco*I site was introduced at the ATG start codon of *gPAPS1* in pSV1 by overlap PCR using primer oSV104, oSV105, oSV91, and oSV101. The PCR product was ligated into pSV1 using *Cl*aI and *Bst*EII sites to create pSV5c (pSV1-SDM-*Nco*I at ATG-*gPAPS1*). The genomic *PAPS4* fragment starting at the ATG start codon was

released from pSV5b by digesting with *Nco*I and ligated into pSV5c digested with *Nco*I to give pSV5d (ML939-pPAPS1::ATG-*gPAPS4*-PAPS4UTR3'). The *pPAPS1::genomicPAPS4* fragment was released from pSV5d by digesting with *Asc*I and ligated into the *Asc*I site of pBarMAP [a derivative of pGPTV-BAR (16)] to create pSV5e (pBarMAP/*Asc*I/pPAPS1UTR5::ATG-*gPAPS4*-PAPS4UTR3'). This plasmid pSV5e was used to transform *paps1-1* mutants.

**Chimeric construct pPAPS1::NPAPS4::CPAPS1.** A *Stu*I site was introduced into the genomic *PAPS1* fragment in pSV5c at the nucleotide that encodes the start of the C-terminal domain of the PAPS1 protein by overlap PCR using primer oSV202, oSV203, oSV102, and oSV103. The PCR product was ligated into pSV5c (pSV1-SDM-*Nco*I at ATG-*gPAPS1*) using *Pme*I and *Bsp*1407I sites to create pSV12 (pSV1-SDM-*Nco*I at ATG-*gNPAPS1*-*Stu*I-*gCPAPS1*). The *Stu*I/*Pst*I fragment from pSV12 (containing the C-terminal coding region of the PAPS1 protein) was ligated into the *Stu*I/*Pst*I-digested vector pSV5d (containing the pPAPS1::*gPAPS4*-N-terminal coding region) to create pSV14 (pPAPS1::UTR5PAPS1::NPAPS4::CtermPAPS1). The fragment containing the chimeric construct was released from pSV14 by digesting with *Asc*I and was ligated into the *Asc*I site of pBarMAP to create pSV15 [pBarMAP/*Asc*I/pPAPS1::UTR5PAPS1::ATGNPAPS4-CtermPAPS1 (all genomic)]. This plasmid pSV15 was used to transform *paps1-1* mutants.

With this cloning procedure, the amino acid sequence at the junction between the N and C terminus of the resulting chimeric protein was FVFPNGYRRPSHT, whereas the original sequence at corresponding position for PAPS1 is FVFPGGVRRPSHT and for PAPS4 is FVFPNGYRRRQRSRH.

**Constructs for expression of PAPS1 proteins in *Escherichia coli*.** The full-length PAPS1 coding region, amplified from cDNA of either wild-type or mutated *paps1-1* plants, were subcloned into pET28a (Novagen) between *Nde*I and *Eco*RI site. This results in a translational fusion of the His-tag to the N terminus of PAPS1. The resulting plasmids pSV11b (pET28a-PAPS1cDNA-wt) and pSV11d (pET28a\_cDNA-PAPS1-P313S-mutated) were verified by DNA sequencing.

Primers used for cloning:

| Primer | Name               | Sequence                                 |
|--------|--------------------|------------------------------------------|
| oSV102 | At1g17980_exon10R  | ACTGCTTCATAAGGGAAAGGAG                   |
| oSV103 | At1g17980_exon10F  | GCAGAAGGCGAGCAATTGCA                     |
| oSV106 | At4g32850_1R       | CACACAAAGTATCAATGTCAG                    |
| oSV107 | At4g32850_2F       | GTCACGCTAATGTATAGATCG                    |
| oSV112 | At4g32850_ATGNcoIF | CAATCGTGCCATGGTGGGTACTCAAATTTAGG         |
| oSV113 | At4g32850_AtgNcoIR | GTACCCACCACCATGGCAGATTGATAATCCTAAGC      |
| oSV202 | StuI_PAP1_F        | GAGTTAGACCTAGGCCCTCACATACCTCTAAAGGAACATG |
| oSV203 | StuI_PAP1_R        | AGAGGTATGTGAAGGCCTAGGTCTAACTCCACCAGGAAAC |

- Alonso JM, et al. (2003) Genome-wide insertional mutagenesis of *Arabidopsis thaliana*. *Science* 301(5633):653–657.
- Woody ST, Austin-Phillips S, Amasino RM, Krysan PJ (2007) The WiscDsLox T-DNA collection: An *Arabidopsis* community resource generated by using an improved high-throughput T-DNA sequencing pipeline. *J Plant Res* 120(1):157–165.
- Liu F, Marquardt S, Lister C, Swiezewski S, Dean C (2010) Targeted 3' processing of antisense transcripts triggers *Arabidopsis* FLC chromatin silencing. *Science* 327(5961):94–97.
- Aarts N, et al. (1998) Different requirements for EDS1 and NDR1 by disease resistance genes define at least two R gene-mediated signaling pathways in *Arabidopsis*. *Proc Natl Acad Sci USA* 95(17):10306–10311.
- Glazebrook J, Rogers EE, Ausubel FM (1996) Isolation of *Arabidopsis* mutants with enhanced disease susceptibility by direct screening. *Genetics* 143(2):973–982.
- Johnson MA, Perez-Amador MA, Lidder P, Green PJ (2000) Mutants of *Arabidopsis* defective in a sequence-specific mRNA degradation pathway. *Proc Natl Acad Sci USA* 97(25):13991–13996.
- Spartz AK, et al. (2012) The SAUR19 subfamily of SMALL AUXIN UP RNA genes promote cell expansion. *Plant J* 70(6):978–990.
- Disch S, et al. (2006) The E3 ubiquitin ligase BIG BROTHER controls *Arabidopsis* organ size in a dosage-dependent manner. *Curr Biol* 16(3):272–279.
- Alexander MP (1969) Differential staining of aborted and nonaborted pollen. *Stain Technol* 44(3):117–122.
- Preker PJ, Lingner J, Minvielle-Sebastia L, Keller W (1995) The FIP1 gene encodes a component of a yeast pre-mRNA polyadenylation factor that directly interacts with poly(A) polymerase. *Cell* 81(3):379–389.
- Box MS, Coustham V, Dean C, Mylne JS (2011) Protocol: A simple phenol-based method for 96-well extraction of high quality RNA from *Arabidopsis*. *Plant Methods* 7:7.
- Smyth GK (2004) Linear models and empirical Bayes methods for assessing differential expression in microarray experiments. *Stat Appl Genet Mol Biol* 3(1):Article 3.
- Smyth GK, Speed T (2003) Normalization of cDNA microarray data. *Methods* 31(4):265–273.
- Park MY, Wu G, Gonzalez-Sulser A, Vaucheret H, Poethig RS (2005) Nuclear processing and export of microRNAs in *Arabidopsis*. *Proc Natl Acad Sci USA* 102(10):3691–3696.
- Knee EM, Rivero L, Crist D, Grotewold E, Scholl R (2011) *Germplasm and Molecular Resources. Genetics and Genomics of the Brassicaceae, Plant Genetics and Genomics: Crops and Models*, eds Schmidt R, Bancroft I (Springer, New York), pp 437–468.
- Becker D, Kemper E, Schell J, Masterson R (1992) New plant binary vectors with selectable markers located proximal to the left T-DNA border. *Plant Mol Biol* 20(6):1195–1197.



*paps1-1* allele (mut). Asterisk indicates the position of the full-length protein. Marker sizes are in kDa. (F) Genetic interaction between *paps1-1* and *cstf64-1*. The numbers and proportions of aborted seeds are shown for the indicated genotypes. (G) Photographs of Alexander-stained mature pollen from Ler wild-type and *paps1-1* mutant plants, as well as from a *paps1-3/+* heterozygous plant.

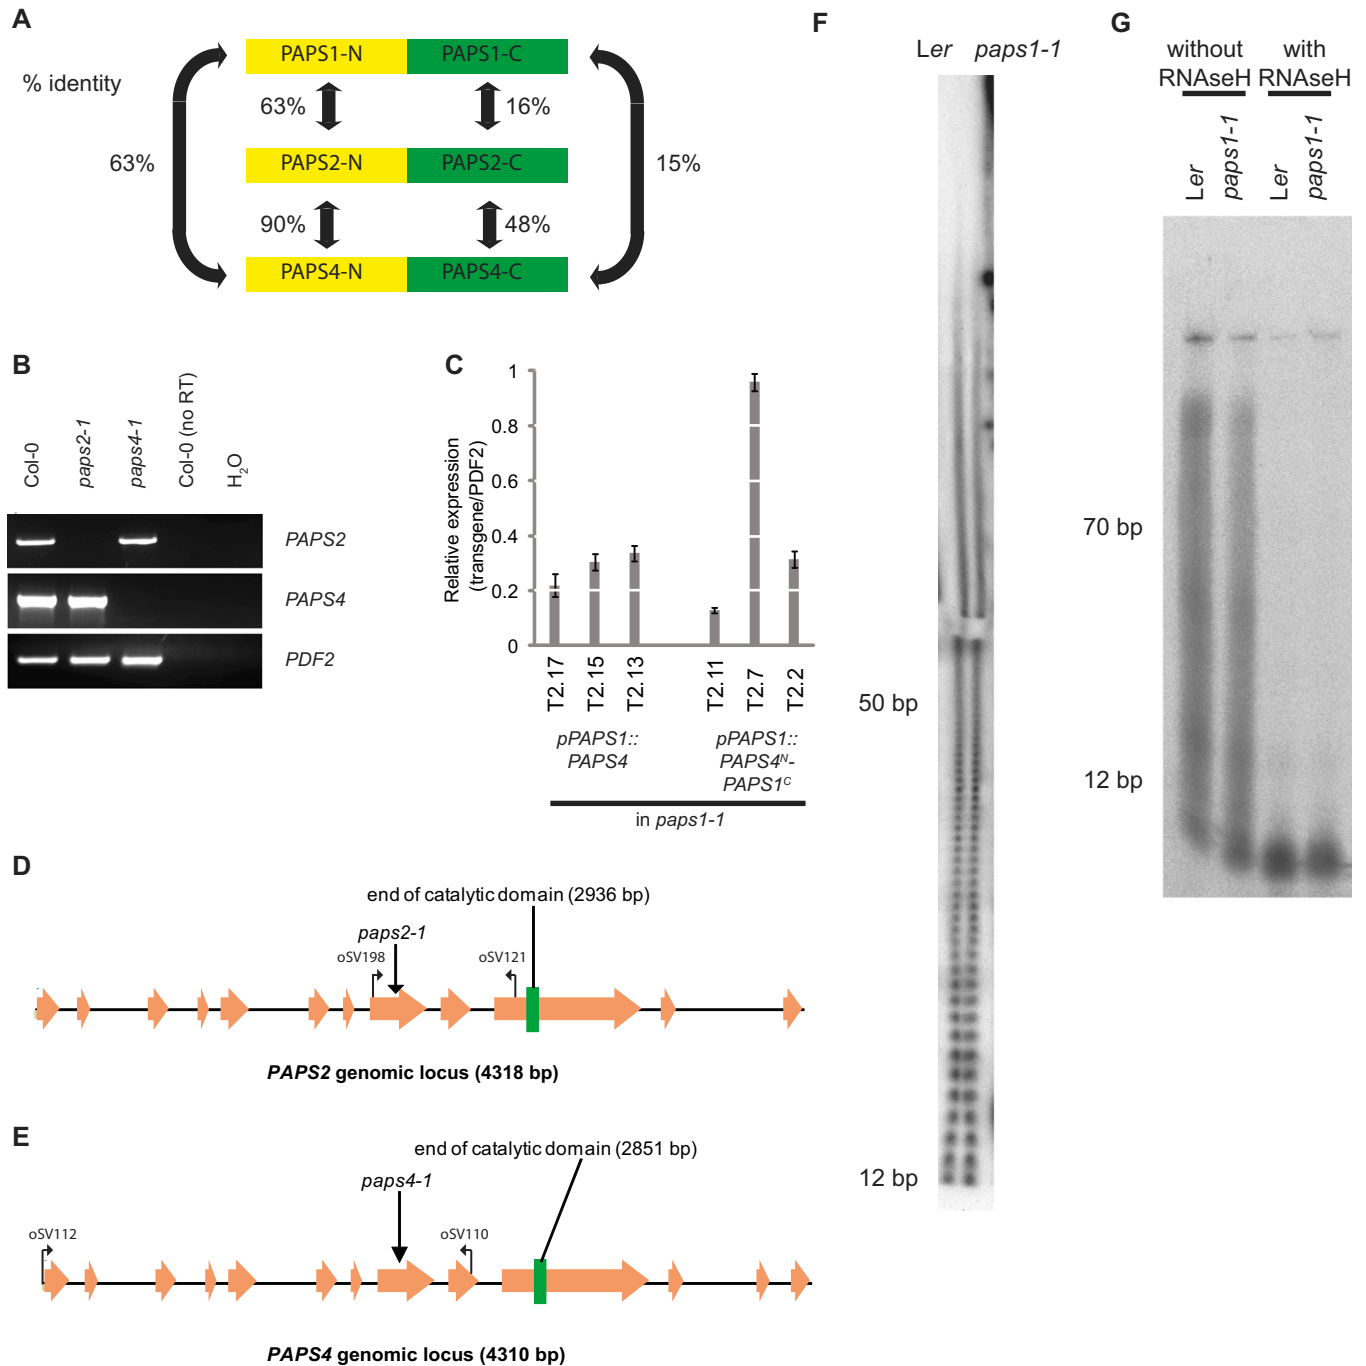

**Fig. S2.** Molecular characterization of *PAPS* isoforms in *Arabidopsis thaliana*. (A) Sequence comparison of the three nuclear *PAPS* proteins. Values shown are amino acid identities between the indicated protein domains. (B) Agarose-gel electrophoresis of RT-PCR products on RNA from the indicated genotypes using primers directed against the target transcripts shown on the right. (C) Expression of the indicated *PAPS* chimeric transgenes as determined by quantitative RT-PCR on RNA from three independent lines each. Primers used amplify only the chimeric transcripts which contain the 5' UTR from *PAPS1* and the region coding for the N-terminal protein domain from *PAPS4*. Expression was normalized to that of the constitutive control gene *PDF2* (*AT1G13320*). Values shown are the means  $\pm$  SE from three technical replicates on one biological replicate of pooled inflorescences. (D and E) Schematic representation of *PAPS2* (D) and *PAPS4* (E) gene structure and the position of mutant alleles. Beige arrows represent exons, black lines show introns. The position of primers used for the RT-PCR in B is indicated (oSV198, oSV121 for *PAPS2*; oSV110, oSV112 for *PAPS4*). (F) Autoradiogram of radioactively labeled bulk poly(A) tails from Ler (Left) and *paps1-1* mutant seedlings (Right) grown for 11 d at 28 °C. Poly(A) tails were separated on an 8.3 M urea/10% polyacrylamide gel. Fig. S1D shows phenotypes of *paps1-1* mutant seedlings grown at 28 °C. The discontinuity at around 70 bp is due to a tear in the gel. (G) Same as F, but including control reactions treated with RNaseH/oligo(dT) before cordycepin labeling to demonstrate that the observed labeled products indeed represent poly(A) tails.



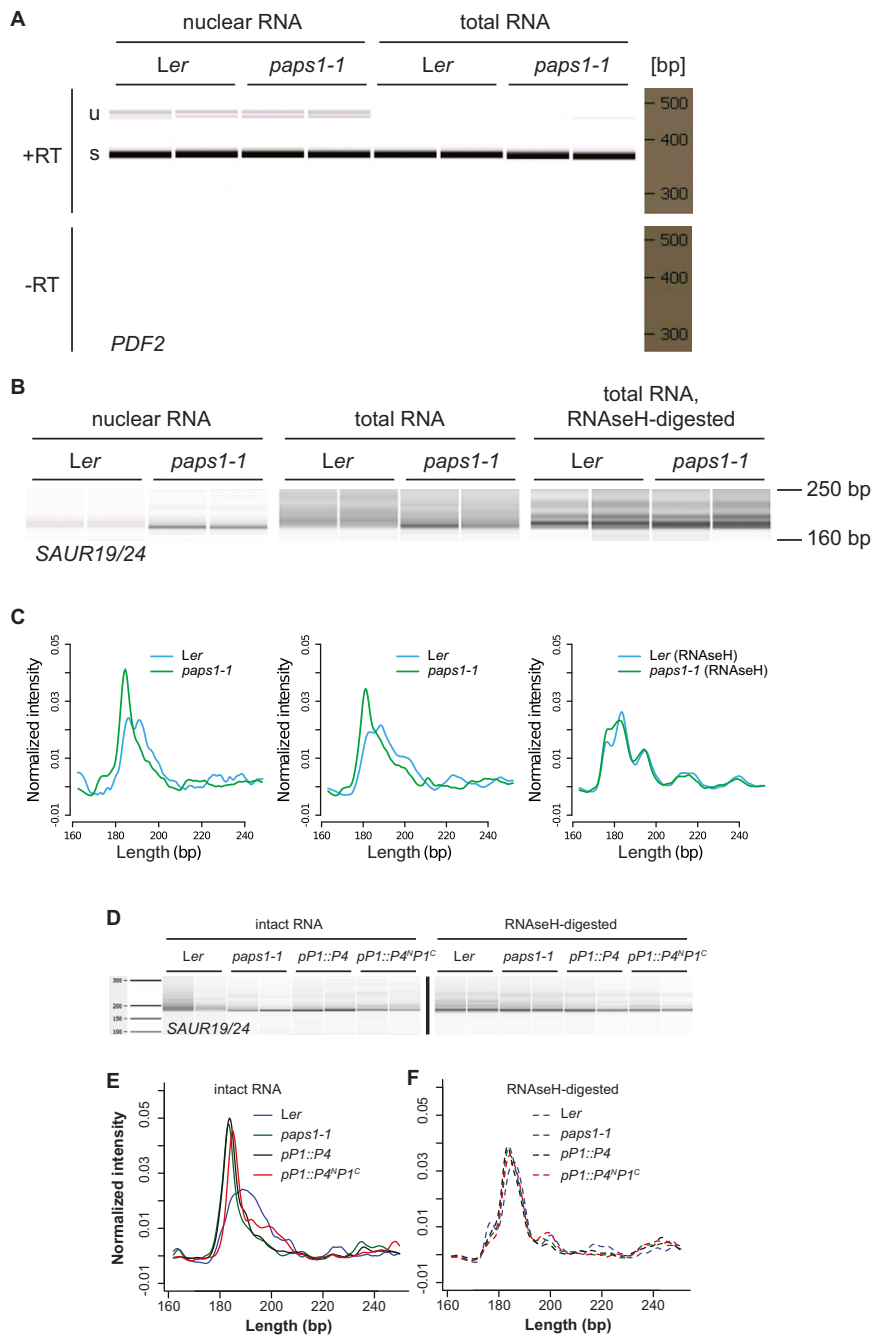

**Fig. 54.** Nuclear polyadenylation of *SAUR* transcripts is defective in *paps1-1* mutants, but polyadenylation is partially rescued in plants expressing the chimeric PAPS4<sup>N</sup>-PAPS1<sup>C</sup> protein. (A) Bioanalyzer electropherogram of RT-PCR products against the constitutive-control gene *PDF2* on oligo(dT)-primed cDNA from nuclear RNA (Left) or total cellular RNA (Right). The primers used span two introns, and “s” indicates completely spliced products, whereas “u” marks unspliced or partially spliced products. Quantification of peak intensities shows that the ratio of unspliced/partially spliced transcript to completely spliced transcript is more than 14-fold higher in the nuclear relative to the total-RNA sample. RT, reverse transcriptase. (B) Bioanalyzer electropherogram of RT-PCR-amplified 3' ends of *SAUR19/24* transcripts from the indicated genotypes. Two biological replicates per genotype are shown. RNA had been isolated from purified nuclei (Left) or from total cellular extract (Center). (Right) Total RNA digested with RNaseH and oligo(dT) before reverse transcription was used for these reactions. (C) Normalized signal intensities of the PCR products in B, each panel corresponding to the electropherogram shown above. (D) Bioanalyzer electropherogram of RT-PCR-amplified 3' ends of *SAUR19/24* transcripts from the indicated genotypes. Two biological replicates per genotype are shown. RNA had been left untreated (Left) or poly(A) tails had been digested with RNaseH and oligo(dT) (Right) before reverse transcription. (E and F) Normalized signal intensities of the PCR-products in D, with intact-RNA samples in E and oligo(dT)/RNaseH-digested RNA samples in F. Averages of the two biological replicates per genotype are shown.
